# Supplementary material
Source: PubMed Central journal article supplement (PMC4348382)
Supplement: jcbfm2014214x1.pdf [file jcbfm2014214x1.pdf]

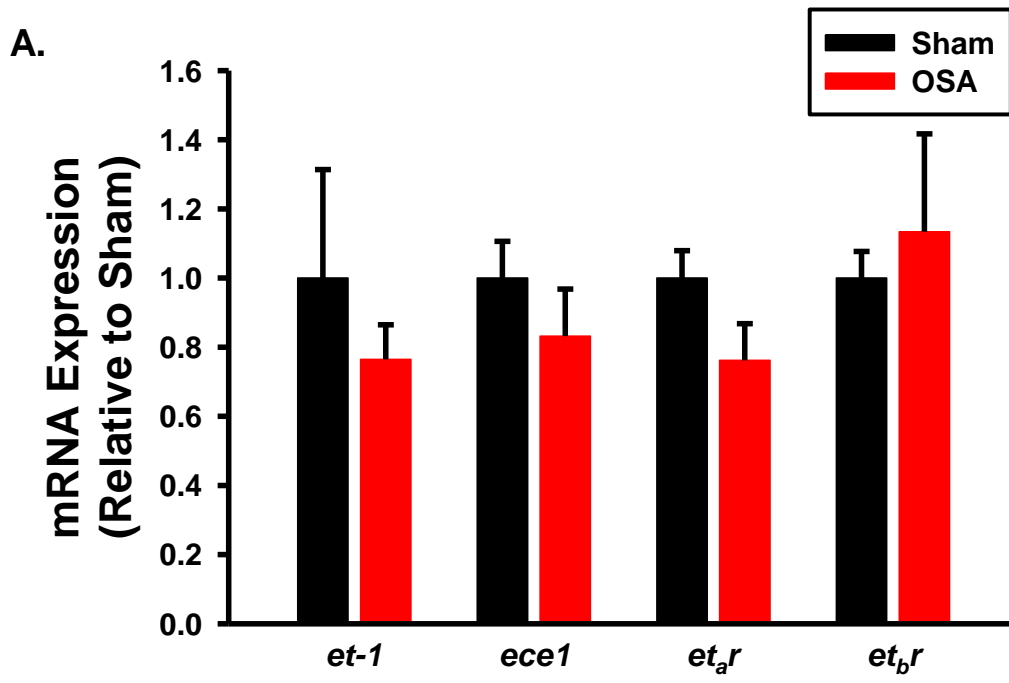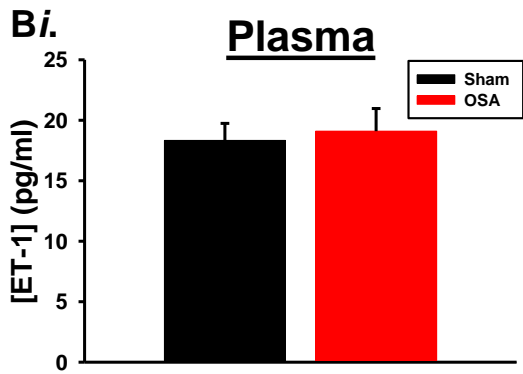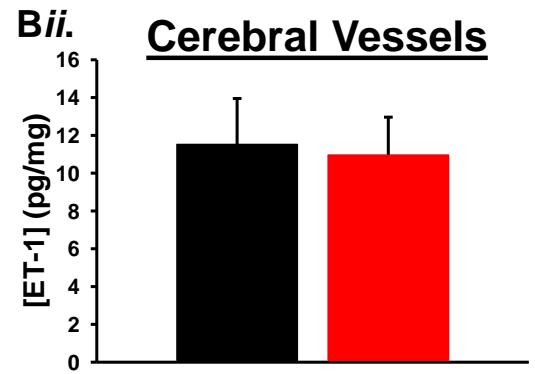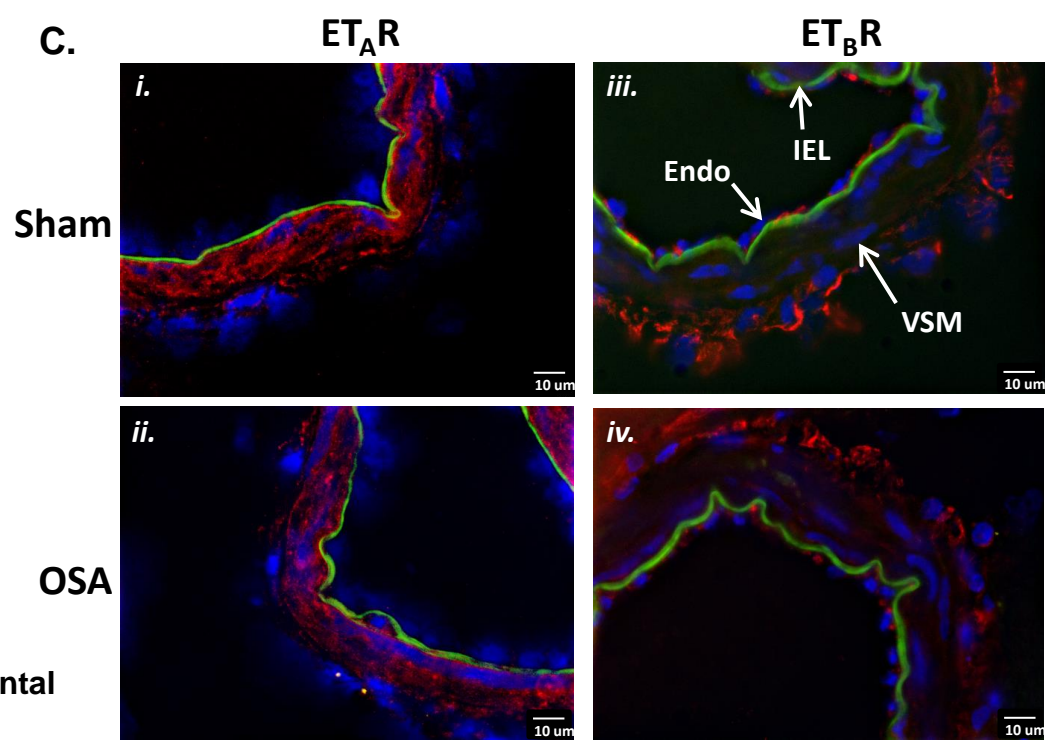

Supplemental Figure 1.

### **Supplemental Figure Legend**

Supplemental Figure 1. Four weeks of apneas did not significantly alter cerebral artery mRNA expression levels of *et-1*, *ece-1*, *et-a*, or *et-b* (A). Plasma and cerebral vessel levels of ET-1 were not altered following four weeks of apneas (B). Data in A & B represent the mean  $\pm$  S.E.M, n=5-6. Immunohistochemistry of ET<sub>A</sub>R (red) demonstrates localization in vascular smooth muscle (VSM) cells of PCAs was unaltered following four weeks of OSA (Ci-ii). Immunohistochemistry of ET<sub>B</sub>R (red) demonstrates localization in endothelial (Endo) and vascular smooth muscle cells of PCAs was unaltered following four weeks of OSA (Ciii-iv). While ET<sub>B</sub>R are predominantly expressed on the endothelium, they are also expressed on VSM. Internal elastic lamina (IEL) is green and nuclei are blue. Images are representative of three observations made per group.
